# Supplementary material for: Extracellular vesicles in patients in the acute phase of psychosis and after clinical improvement: an explorative study
Source: PeerJ. 2020 Aug 26;8:e9714. doi: 10.7717/peerj.9714 (PMC7501784; doi:10.7717/peerj.9714)
Supplement: Table S2C — Over-represented GO terms for the proteins significantly decreased in T1 and/or T2 compared with HC, compared to the entire human proteome for Biological process and Cellular compartment GO categories. The table provide number of proteins defined in the GO-term for the reference proteome and our EV proteome (Sample_Down), respectively, the expected number of proteins for the EV proteome based on relative representation in the reference proteome and size of the EV-proteome, the difference from the expected number given as fold-enrichment, and the p-value from the Fisher’s exact test and FDR-adjusted values for the fold enrichment. [file peerj-08-9714-s004.xlsx]

## Sheet: GO Down FDR01
Table S2C: Over-represented GO terms for the proteins significantly decreased in T1 and/or T2 compared with HC, compared to the entire human proteome for Biological process and Cellular compartment GO categories. The table provide number of proteins defined in the GO-term for the reference proteome and our EV proteome, respectively, the expected number of proteins for the EV proteome based on rel…
Analysis Type:	PANTHER Overrepresentation Test (Released 20200407)
Annotation Version and Release Date:	GO Ontology database Released 2020-02-21
Analyzed List:	Sample_down: Proteins significantly down-regulated in T1 and/or T2 compared with HC (Homo sapiens)
Reference List:	Homo sapiens (all genes in database)
Test Type:	FISHER
Correction:	FDR
GO biological process complete	Homo sapiens - REFLIST (20996)	Sample_down (30)	Sample_down (expected)	Sample_down (over/under)	Sample_down (fold Enrichment)	Sample_down (raw P-value)	Sample_down (FDR)
negative regulation of actin filament depolymerization (GO:0030835)	36	5	0.04	+	> 100	1.45e-09	1.15e-05
actin filament capping (GO:0051693)	33	5	0.04	+	> 100	9.72e-10	1.55e-05
regulation of actin filament depolymerization (GO:0030834)	51	5	0.06	+	78.62	7.29e-09	3.87e-05
negative regulation of actin filament polymerization (GO:0030837)	58	5	0.07	+	69.13	1.33e-08	5.3e-05
negative regulation of protein depolymerization (GO:1901880)	66	5	0.08	+	60.75	2.45e-08	7.81e-05
negative regulation of protein polymerization (GO:0032272)	72	5	0.09	+	55.69	3.7e-08	8.42e-05
negative regulation of protein-containing complex disassembly (GO:0043242)	75	5	0.09	+	53.46	4.5e-08	8.94e-05
transport (GO:0006810)	4542	19	5.66	+	3.35	3.55e-08	9.43e-05
establishment of localization (GO:0051234)	4672	19	5.83	+	3.26	5.76e-08	0.000102
regulation of protein depolymerization (GO:1901879)	88	5	0.11	+	45.57	9.61e-08	0.000153
plasma membrane organization (GO:0007009)	94	5	0.12	+	42.66	1.32e-07	0.00019
endoplasmic reticulum to Golgi vesicle-mediated transport (GO:0006888)	197	6	0.25	+	24.43	1.54e-07	0.000204
homeostasis of number of cells (GO:0048872)	206	6	0.26	+	23.36	1.99e-07	0.000243
homeostatic process (GO:0042592)	1664	12	2.07	+	5.78	2.3e-07	0.000261
localization (GO:0051179)	5778	20	7.2	+	2.78	2.68e-07	0.000284
regulation of intestinal absorption (GO:1904478)	9	3	0.01	+	> 100	3.74e-07	0.000372
regulation of protein-containing complex disassembly (GO:0043244)	121	5	0.15	+	33.14	4.39e-07	0.000411
regulation of biological quality (GO:0065008)	4112	17	5.13	+	3.32	5.2e-07	0.000459
negative regulation of protein-containing complex assembly (GO:0031333)	137	5	0.17	+	29.27	7.95e-07	0.000666
triglyceride-rich lipoprotein particle remodeling (GO:0034370)	13	3	0.02	+	> 100	9.5e-07	0.000756
immune system process (GO:0002376)	2769	14	3.45	+	4.05	1.08e-06	0.000782
negative regulation of supramolecular fiber organization (GO:1902904)	146	5	0.18	+	27.46	1.08e-06	0.000817
negative regulation of cytoskeleton organization (GO:0051494)	153	5	0.19	+	26.21	1.35e-06	0.000933
negative regulation of cellular component organization (GO:0051129)	723	8	0.9	+	8.87	1.94e-06	0.00119
high-density lipoprotein particle remodeling (GO:0034375)	17	3	0.02	+	> 100	1.93e-06	0.00123
reverse cholesterol transport (GO:0043691)	17	3	0.02	+	> 100	1.93e-06	0.00128
regulation of plasma lipoprotein particle levels (GO:0097006)	72	4	0.09	+	44.55	2.28e-06	0.00134
regulation of actin filament polymerization (GO:0030833)	175	5	0.22	+	22.91	2.56e-06	0.00145
protein localization to plasma membrane (GO:0072659)	189	5	0.24	+	21.22	3.69e-06	0.00196
erythrocyte differentiation (GO:0030218)	81	4	0.1	+	39.6	3.57e-06	0.00196
regulation of actin filament length (GO:0030832)	192	5	0.24	+	20.88	3.98e-06	0.00198
regulation of actin polymerization or depolymerization (GO:0008064)	191	5	0.24	+	20.99	3.88e-06	0.00199
positive regulation of protein binding (GO:0032092)	89	4	0.11	+	36.04	5.12e-06	0.00247
erythrocyte homeostasis (GO:0034101)	90	4	0.11	+	35.64	5.34e-06	0.0025
chemical homeostasis (GO:0048878)	1130	9	1.41	+	6.39	5.57e-06	0.00253
regulation of protein binding (GO:0043393)	215	5	0.27	+	18.65	6.82e-06	0.00293
membrane organization (GO:0061024)	857	8	1.07	+	7.49	6.75e-06	0.00299
protein-containing complex remodeling (GO:0034367)	29	3	0.04	+	82.96	8.3e-06	0.003
cytoskeleton organization (GO:0007010)	1179	9	1.47	+	6.12	7.85e-06	0.00305
cellular component organization (GO:0016043)	5581	18	6.96	+	2.59	7.68e-06	0.00306
hematopoietic or lymphoid organ development (GO:0048534)	617	7	0.77	+	9.1	8.26e-06	0.00306
protein-lipid complex remodeling (GO:0034368)	28	3	0.03	+	85.92	7.53e-06	0.00307
Golgi vesicle transport (GO:0048193)	396	6	0.49	+	12.15	8.16e-06	0.00309
plasma lipoprotein particle remodeling (GO:0034369)	28	3	0.03	+	85.92	7.53e-06	0.00315
regulation of actin filament-based process (GO:0032970)	404	6	0.5	+	11.91	9.13e-06	0.00323
protein localization to cell periphery (GO:1990778)	232	5	0.29	+	17.28	9.79e-06	0.00339
regulation of protein polymerization (GO:0032271)	234	5	0.29	+	17.14	1.02e-05	0.00345
erythrocyte development (GO:0048821)	32	3	0.04	+	75.18	1.09e-05	0.00362
myeloid cell homeostasis (GO:0002262)	110	4	0.14	+	29.16	1.15e-05	0.00373
immune system development (GO:0002520)	654	7	0.82	+	8.58	1.2e-05	0.00383
cellular component organization or biogenesis (GO:0071840)	5772	18	7.2	+	2.5	1.28e-05	0.004
regulation of protein-containing complex assembly (GO:0043254)	452	6	0.56	+	10.65	1.71e-05	0.00524
regulation of digestive system process (GO:0044058)	40	3	0.05	+	60.15	2.05e-05	0.00615
regulation of actin filament organization (GO:0110053)	278	5	0.35	+	14.42	2.3e-05	0.00678
plasma lipoprotein particle organization (GO:0071827)	44	3	0.05	+	54.68	2.68e-05	0.00776
regulation of cholesterol transport (GO:0032374)	46	3	0.06	+	52.3	3.04e-05	0.00864
regulation of sterol transport (GO:0032371)	47	3	0.06	+	51.19	3.23e-05	0.00903
lipid transport (GO:0006869)	301	5	0.38	+	13.32	3.34e-05	0.00918
protein-lipid complex subunit organization (GO:0071825)	48	3	0.06	+	50.12	3.43e-05	0.00926
positive regulation of molecular function (GO:0044093)	1823	10	2.27	+	4.4	3.79e-05	0.0101
lipid localization (GO:0010876)	326	5	0.41	+	12.3	4.86e-05	0.0127
cholesterol transport (GO:0030301)	55	3	0.07	+	43.74	5.06e-05	0.013
regulation of intestinal cholesterol absorption (GO:0030300)	7	2	0.01	+	> 100	5.34e-05	0.0133
cellular component morphogenesis (GO:0032989)	829	7	1.03	+	6.77	5.43e-05	0.0133
regulation of intestinal lipid absorption (GO:1904729)	7	2	0.01	+	> 100	5.34e-05	0.0135
myeloid cell development (GO:0061515)	58	3	0.07	+	41.48	5.88e-05	0.0142
hemopoiesis (GO:0030097)	569	6	0.71	+	8.46	6.12e-05	0.0145
positive regulation of binding (GO:0051099)	177	4	0.22	+	18.12	7.04e-05	0.0165
chylomicron remodeling (GO:0034371)	9	2	0.01	+	> 100	8.15e-05	0.018
regulation of actin cytoskeleton organization (GO:0032956)	361	5	0.45	+	11.11	7.83e-05	0.0181
very-low-density lipoprotein particle remodeling (GO:0034372)	9	2	0.01	+	> 100	8.15e-05	0.0183
positive regulation of cholesterol esterification (GO:0010873)	9	2	0.01	+	> 100	8.15e-05	0.0185
chylomicron assembly (GO:0034378)	10	2	0.01	+	> 100	9.77e-05	0.0197
cell development (GO:0048468)	1626	9	2.03	+	4.44	9.94e-05	0.0198
regulation of supramolecular fiber organization (GO:1902903)	374	5	0.47	+	10.72	9.23e-05	0.0198
ammonium transport (GO:0015696)	10	2	0.01	+	> 100	9.77e-05	0.0199
regulation of binding (GO:0051098)	374	5	0.47	+	10.72	9.23e-05	0.0201
hemoglobin metabolic process (GO:0020027)	10	2	0.01	+	> 100	9.77e-05	0.0202
ammonium transmembrane transport (GO:0072488)	10	2	0.01	+	> 100	9.77e-05	0.0205
sterol transport (GO:0015918)	69	3	0.09	+	34.87	9.66e-05	0.0205
cofactor catabolic process (GO:0051187)	71	3	0.09	+	33.89	0.000105	0.0206
regulation of cellular component size (GO:0032535)	388	5	0.48	+	10.33	0.000109	0.021
regulation of cellular component organization (GO:0051128)	2518	11	3.14	+	3.5	0.000109	0.0211
negative regulation of organelle organization (GO:0010639)	396	5	0.49	+	10.13	0.00012	0.0228
phosphatidylcholine metabolic process (GO:0046470)	76	3	0.09	+	31.66	0.000127	0.0238
regulation of cellular component biogenesis (GO:0044087)	960	7	1.2	+	5.85	0.000136	0.0245
regulation of cholesterol esterification (GO:0010872)	12	2	0.01	+	> 100	0.000134	0.0246
phospholipid efflux (GO:0033700)	12	2	0.01	+	> 100	0.000134	0.0249
response to stress (GO:0006950)	3620	13	4.51	+	2.88	0.000142	0.0254
axon development (GO:0061564)	415	5	0.52	+	9.66	0.000149	0.0264
high-density lipoprotein particle assembly (GO:0034380)	13	2	0.02	+	> 100	0.000155	0.0265
negative regulation of platelet-derived growth factor receptor signaling pathway (GO:0010642)	13	2	0.02	+	> 100	0.000155	0.0268
removal of superoxide radicals (GO:0019430)	13	2	0.02	+	> 100	0.000155	0.0271
cholesterol homeostasis (GO:0042632)	84	3	0.1	+	28.64	0.00017	0.0287
defense response (GO:0006952)	1360	8	1.7	+	4.72	0.000179	0.0288
negative regulation of immune system process (GO:0002683)	431	5	0.54	+	9.3	0.000178	0.0289
endomembrane system organization (GO:0010256)	431	5	0.54	+	9.3	0.000178	0.0292
sterol homeostasis (GO:0055092)	85	3	0.11	+	28.3	0.000175	0.0294
myeloid cell differentiation (GO:0030099)	226	4	0.28	+	14.19	0.000177	0.0294
barbed-end actin filament capping (GO:0051016)	15	2	0.02	+	> 100	0.000201	0.0313
cellular response to oxygen radical (GO:0071450)	15	2	0.02	+	> 100	0.000201	0.0316
cellular response to superoxide (GO:0071451)	15	2	0.02	+	> 100	0.000201	0.0319
phospholipid transport (GO:0015914)	90	3	0.11	+	26.73	0.000207	0.0319
cell morphogenesis (GO:0000902)	724	6	0.9	+	6.65	0.000226	0.0343
regulation of monocyte chemotactic protein-1 production (GO:0071637)	16	2	0.02	+	> 100	0.000225	0.0345
response to superoxide (GO:0000303)	17	2	0.02	+	94.35	0.000252	0.0378
response to oxygen radical (GO:0000305)	18	2	0.02	+	89.11	0.000279	0.0412
system development (GO:0048731)	4444	14	5.54	+	2.53	0.000278	0.0413
cellular component assembly (GO:0022607)	2320	10	2.89	+	3.46	0.000288	0.0421
response to chemical (GO:0042221)	4501	14	5.61	+	2.49	0.00032	0.0462
innate immune response in mucosa (GO:0002227)	20	2	0.02	+	80.2	0.000339	0.0486
Analysis Type:	PANTHER Overrepresentation Test (Released 20200407)
Annotation Version and Release Date:	GO Ontology database Released 2020-02-21
Analyzed List:	Sample_down: Proteins significantly down-regulated in T1 and/or T2 compared with HC (Homo sapiens)
Reference List:	Homo sapiens (all genes in database)
Test Type:	FISHER
Correction:	FDR
GO cellular component complete	Homo sapiens - REFLIST (20996)	Sample_down (30)	Sample_down (expected)	Sample_down (over/under)	Sample_down (fold Enrichment)	Sample_down (raw P-value)	Sample_down (FDR)
spectrin-associated cytoskeleton (GO:0014731)	9	5	0.01	+	> 100	3.96e-12	7.93e-09
spectrin (GO:0008091)	9	3	0.01	+	> 100	3.74e-07	0.00025
intrinsic component of the cytoplasmic side of the plasma membrane (GO:0031235)	7	2	0.01	+	> 100	5.34e-05	0.00765
F-actin capping protein complex (GO:0008290)	8	2	0.01	+	> 100	6.67e-05	0.00836
cuticular plate (GO:0032437)	9	2	0.01	+	> 100	8.15e-05	0.00907
chylomicron (GO:0042627)	13	2	0.02	+	> 100	0.000155	0.012
high-density lipoprotein particle (GO:0034364)	27	3	0.03	+	89.11	6.81e-06	0.00273
axon initial segment (GO:0043194)	19	2	0.02	+	84.42	0.000309	0.0193
costamere (GO:0043034)	19	2	0.02	+	84.42	0.000309	0.0188
triglyceride-rich plasma lipoprotein particle (GO:0034385)	21	2	0.03	+	76.38	0.000371	0.0219
very-low-density lipoprotein particle (GO:0034361)	21	2	0.03	+	76.38	0.000371	0.0213
lipoprotein particle (GO:1990777)	37	3	0.05	+	65.02	1.64e-05	0.00366
plasma lipoprotein particle (GO:0034358)	37	3	0.05	+	65.02	1.64e-05	0.00329
M band (GO:0031430)	25	2	0.03	+	64.16	0.000514	0.0278
protein-lipid complex (GO:0032994)	40	3	0.05	+	60.15	2.05e-05	0.00373
cortical cytoskeleton (GO:0030863)	121	6	0.15	+	39.77	9.38e-09	9.4e-06
main axon (GO:0044304)	71	3	0.09	+	33.89	0.000105	0.0105
cortical actin cytoskeleton (GO:0030864)	93	3	0.12	+	25.87	0.000227	0.0152
cytoplasmic side of plasma membrane (GO:0009898)	155	4	0.19	+	20.7	4.25e-05	0.0071
Z disc (GO:0030018)	131	3	0.16	+	18.37	0.000603	0.031
cytoplasmic side of membrane (GO:0098562)	182	4	0.23	+	17.63	7.82e-05	0.00923
blood microparticle (GO:0072562)	143	3	0.18	+	16.82	0.000774	0.0388
I band (GO:0031674)	143	3	0.18	+	16.82	0.000774	0.0379
sarcomere (GO:0030017)	206	4	0.26	+	15.57	0.000125	0.0114
cell cortex (GO:0005938)	327	6	0.41	+	14.71	2.77e-06	0.00139
myofibril (GO:0030016)	227	4	0.28	+	14.13	0.00018	0.0134
basolateral plasma membrane (GO:0016323)	227	4	0.28	+	14.13	0.00018	0.0129
contractile fiber (GO:0043292)	238	4	0.3	+	13.48	0.000215	0.0149
postsynaptic density (GO:0014069)	349	4	0.44	+	9.19	0.000895	0.0427
asymmetric synapse (GO:0032279)	354	4	0.44	+	9.06	0.000943	0.044
side of membrane (GO:0098552)	628	7	0.78	+	8.94	9.26e-06	0.00309
actin cytoskeleton (GO:0015629)	519	5	0.65	+	7.73	0.000415	0.0231
postsynapse (GO:0098794)	648	6	0.81	+	7.43	0.000124	0.0119
cell surface (GO:0009986)	946	8	1.18	+	6.78	1.38e-05	0.00346
plasma membrane region (GO:0098590)	1206	7	1.5	+	4.65	0.000544	0.0287
extracellular exosome (GO:0070062)	2098	10	2.62	+	3.82	0.000125	0.0109
extracellular vesicle (GO:1903561)	2119	10	2.64	+	3.78	0.000136	0.0114
extracellular organelle (GO:0043230)	2124	10	2.65	+	3.78	0.000139	0.0111
cytoskeleton (GO:0005856)	2278	10	2.84	+	3.52	0.000248	0.016
extracellular space (GO:0005615)	3349	14	4.18	+	3.35	1.08e-05	0.00308
extracellular region (GO:0005576)	4380	15	5.46	+	2.75	4.87e-05	0.00752
plasma membrane (GO:0005886)	5752	17	7.17	+	2.37	6.59e-05	0.00881
cell periphery (GO:0071944)	5882	17	7.33	+	2.32	8.97e-05	0.00946
