# Supplementary material for: Extracellular vesicles in patients in the acute phase of psychosis and after clinical improvement: an explorative study
Source: PeerJ. 2020 Aug 26;8:e9714. doi: 10.7717/peerj.9714 (PMC7501784; doi:10.7717/peerj.9714)
Supplement: Table S4 — Proteins classified in the enriched GO terms “main axon” and “postsynapse”, in the group of proteins downregulated in T1 and/or T2 compared with HC (Table S1C). [file peerj-08-9714-s006.xlsx]

## Sheet: GO Down FDR01
Table S4: Proteins classified in the enriched GO terms "main axon" and "postsynapse", in the group of proteins down-regulated in T1 and/or T2 compared with HC (Table S1C).
GO term	Uniprot accession number	Protein name
Synapse
	P35611	Alpha-adducin
	Q01484	Ankyrin-2
	Q12955	Ankyrin-3
	Q92686	Neurogranin
	P11171	Protein 4.1
	P35612	Beta-adducin
	Q01082	Spectrin beta chain, non-erythrocytic 1
Axon
	Q01484	Ankyrin-2
	Q12955	Ankyrin-3
	Q01082	Spectrin beta chain, non-erythrocytic 1
