# Supplementary material for: Extracellular vesicles in patients in the acute phase of psychosis and after clinical improvement: an explorative study
Source: PeerJ. 2020 Aug 26;8:e9714. doi: 10.7717/peerj.9714 (PMC7501784; doi:10.7717/peerj.9714)
Supplement: Table S5 [file peerj-08-9714-s007.xlsx]

## Sheet: Lipoproteins
Table S5: List of identified apolipoproteins in the EV proteome, with normalized average precursor intensities given as average of each patient group.
			Normalized average precursor intensity
Accession	Protein Inference Class	Description	HC	T1	T2
P04114	Single Protein	Apolipoprotein B-100 (APOB_HUMAN)	0.00106622	0.000970616	0.000953248
P08519	Single Protein	Apolipoprotein(a) (APOA_HUMAN)	0.000989025	0.000542613	0.000622869
P02647	Single Protein	Apolipoprotein A-I (APOA1_HUMAN)	0.00568131	0.00463211	0.00396704
P06727	Single Protein	Apolipoprotein A-IV (APOA4_HUMAN)	0.00139964	0.000920455	0.000974081
P02652	Single Protein	Apolipoprotein A-II (APOA2_HUMAN)	0.00405385	0.002422	0.00258264
P02649	Single Protein	Apolipoprotein E (APOE_HUMAN)	0.00108805	0.000864528	0.000768869
P02656	Single Protein	Apolipoprotein C-III (APOC3_HUMAN)	0.00257316	0.00290648	0.00267082
O14791	Single Protein	Apolipoprotein L1 (APOL1_HUMAN)	0.000601454	0.000550224	0.000424886
P02655	Single Protein	Apolipoprotein C-II (APOC2_HUMAN)	0.00178612	0.00221631	0.00181761
O95445	Single Protein	Apolipoprotein M (APOM_HUMAN)	0.000904508	0.000636246	0.000570657
P05090	Single Protein	Apolipoprotein D (APOD_HUMAN)	0.000956338	0.000586436	0.000662922
P02654	Single Protein	Apolipoprotein C-I (APOC1_HUMAN)	0.00157599	0.00117934	0.00111195
P55056	Single Protein	Apolipoprotein C-IV (APOC4_HUMAN)	0.000384521	0.000578719	0.000349028
Q13790	Single Protein	Apolipoprotein F (APOF_HUMAN)	0.000288292	0.00036053	0.000340259
Q6Q788	Single Protein	Apolipoprotein A-V (APOA5_HUMAN)	0.000287227	6.74652e-05	0.000139425
Q5SW96	Single Protein	Low density lipoprotein receptor adapter protein 1 (ARH_HUMAN)	1.1248e-05	0	1.3769e-05
